# Supplementary material for: Effect of Al3+ modification on cobalt ferrite and its impact on the magnetoelectric effect in BCZT–CFO multiferroic composites
Source: Springer Nature journal article supplement (doi:10.1007/s10853-017-1444-4), 2017-08-03
Supplement: MOESM1 [file 13348888]

**Supplementary Information for:**

**Effect of Al3+ modification on cobalt ferrite and its impact on the magnetoelectric effect in BCZT-CFO multiferroic composites**

M. Naveed-Ul-Haq*, 1, Vladimir V. Shvartsman1, Gabriel Constantinescu1, Harsh Trivedi1, Soma Salamon2, Joachim Landers2, Heiko Wende2, Doru C. Lupascu1

1 Institute for Materials Science and Center for Nanointegration Duisburg-Essen (CENIDE), University of Duisburg-Essen, Universitätsstraße 15, 45141 Essen, Germany.

2 Faculty of Physics and Center for Nanointegration Duisburg-Essen (CENIDE), University of Duisburg-Essen, Lotharstraße 1, 47057 Duisburg, Germany.

This Supplementary information contains following data:

1. Mössbauer spectra of (a) CFO(Al) and (b) CFO recorded at 4.3 K with an applied field of 5 T.
2. XRD profiles of CFO(Al) and CFO(undoped) along with Rietveld fittings.
3. M(H) curves for Al3+ doped and pure CFO at different temperatures.
4. Variation of local amplitude (A) and phase (φ) under different in-plane dc magnetic fi*elds for BCZT-CFO(Al)*


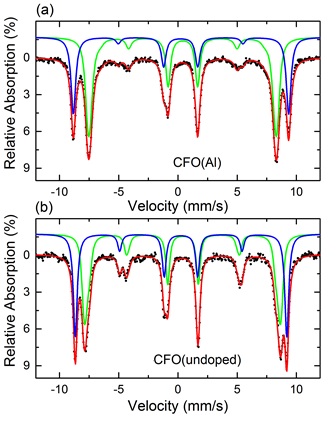


Fig. S1 Mössbauer spectra of (a) CFO(Al) and (b) CFO recorded at 4.3 K with an applied field of 5 T along the gamma ray propagation direction. Black dots represent experimental data while lines show theoretical fits, consisting of sub-spectra of tetrahedral A-sites (blue), octahedral B-sites (green) as well as the overall fit (red).


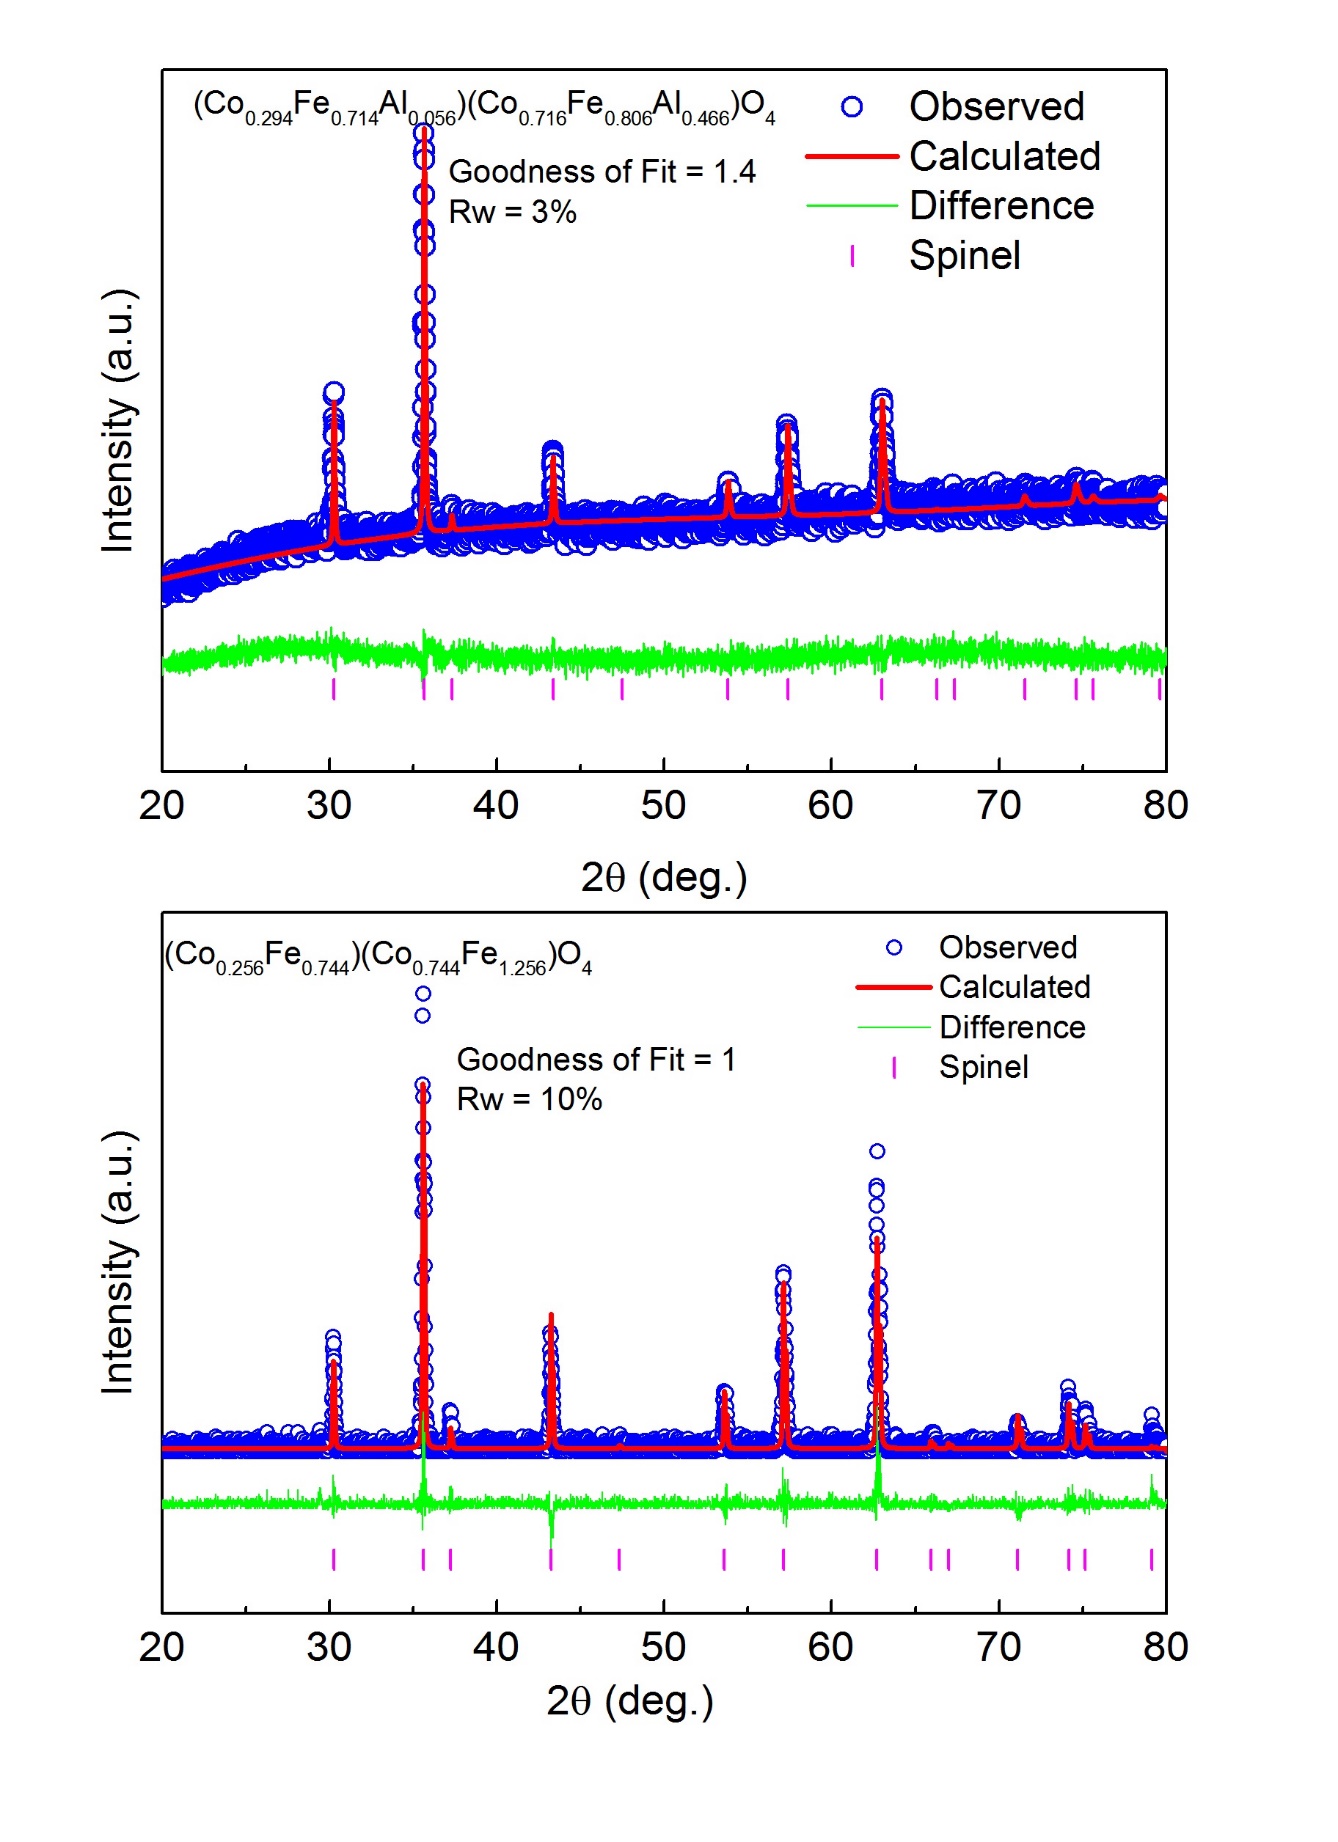


Fig. S2 XRD profiles of CFO(Al) and CFO(undoped) along with Rietveld fittings. The refinements were carried out using GSAS II software1.


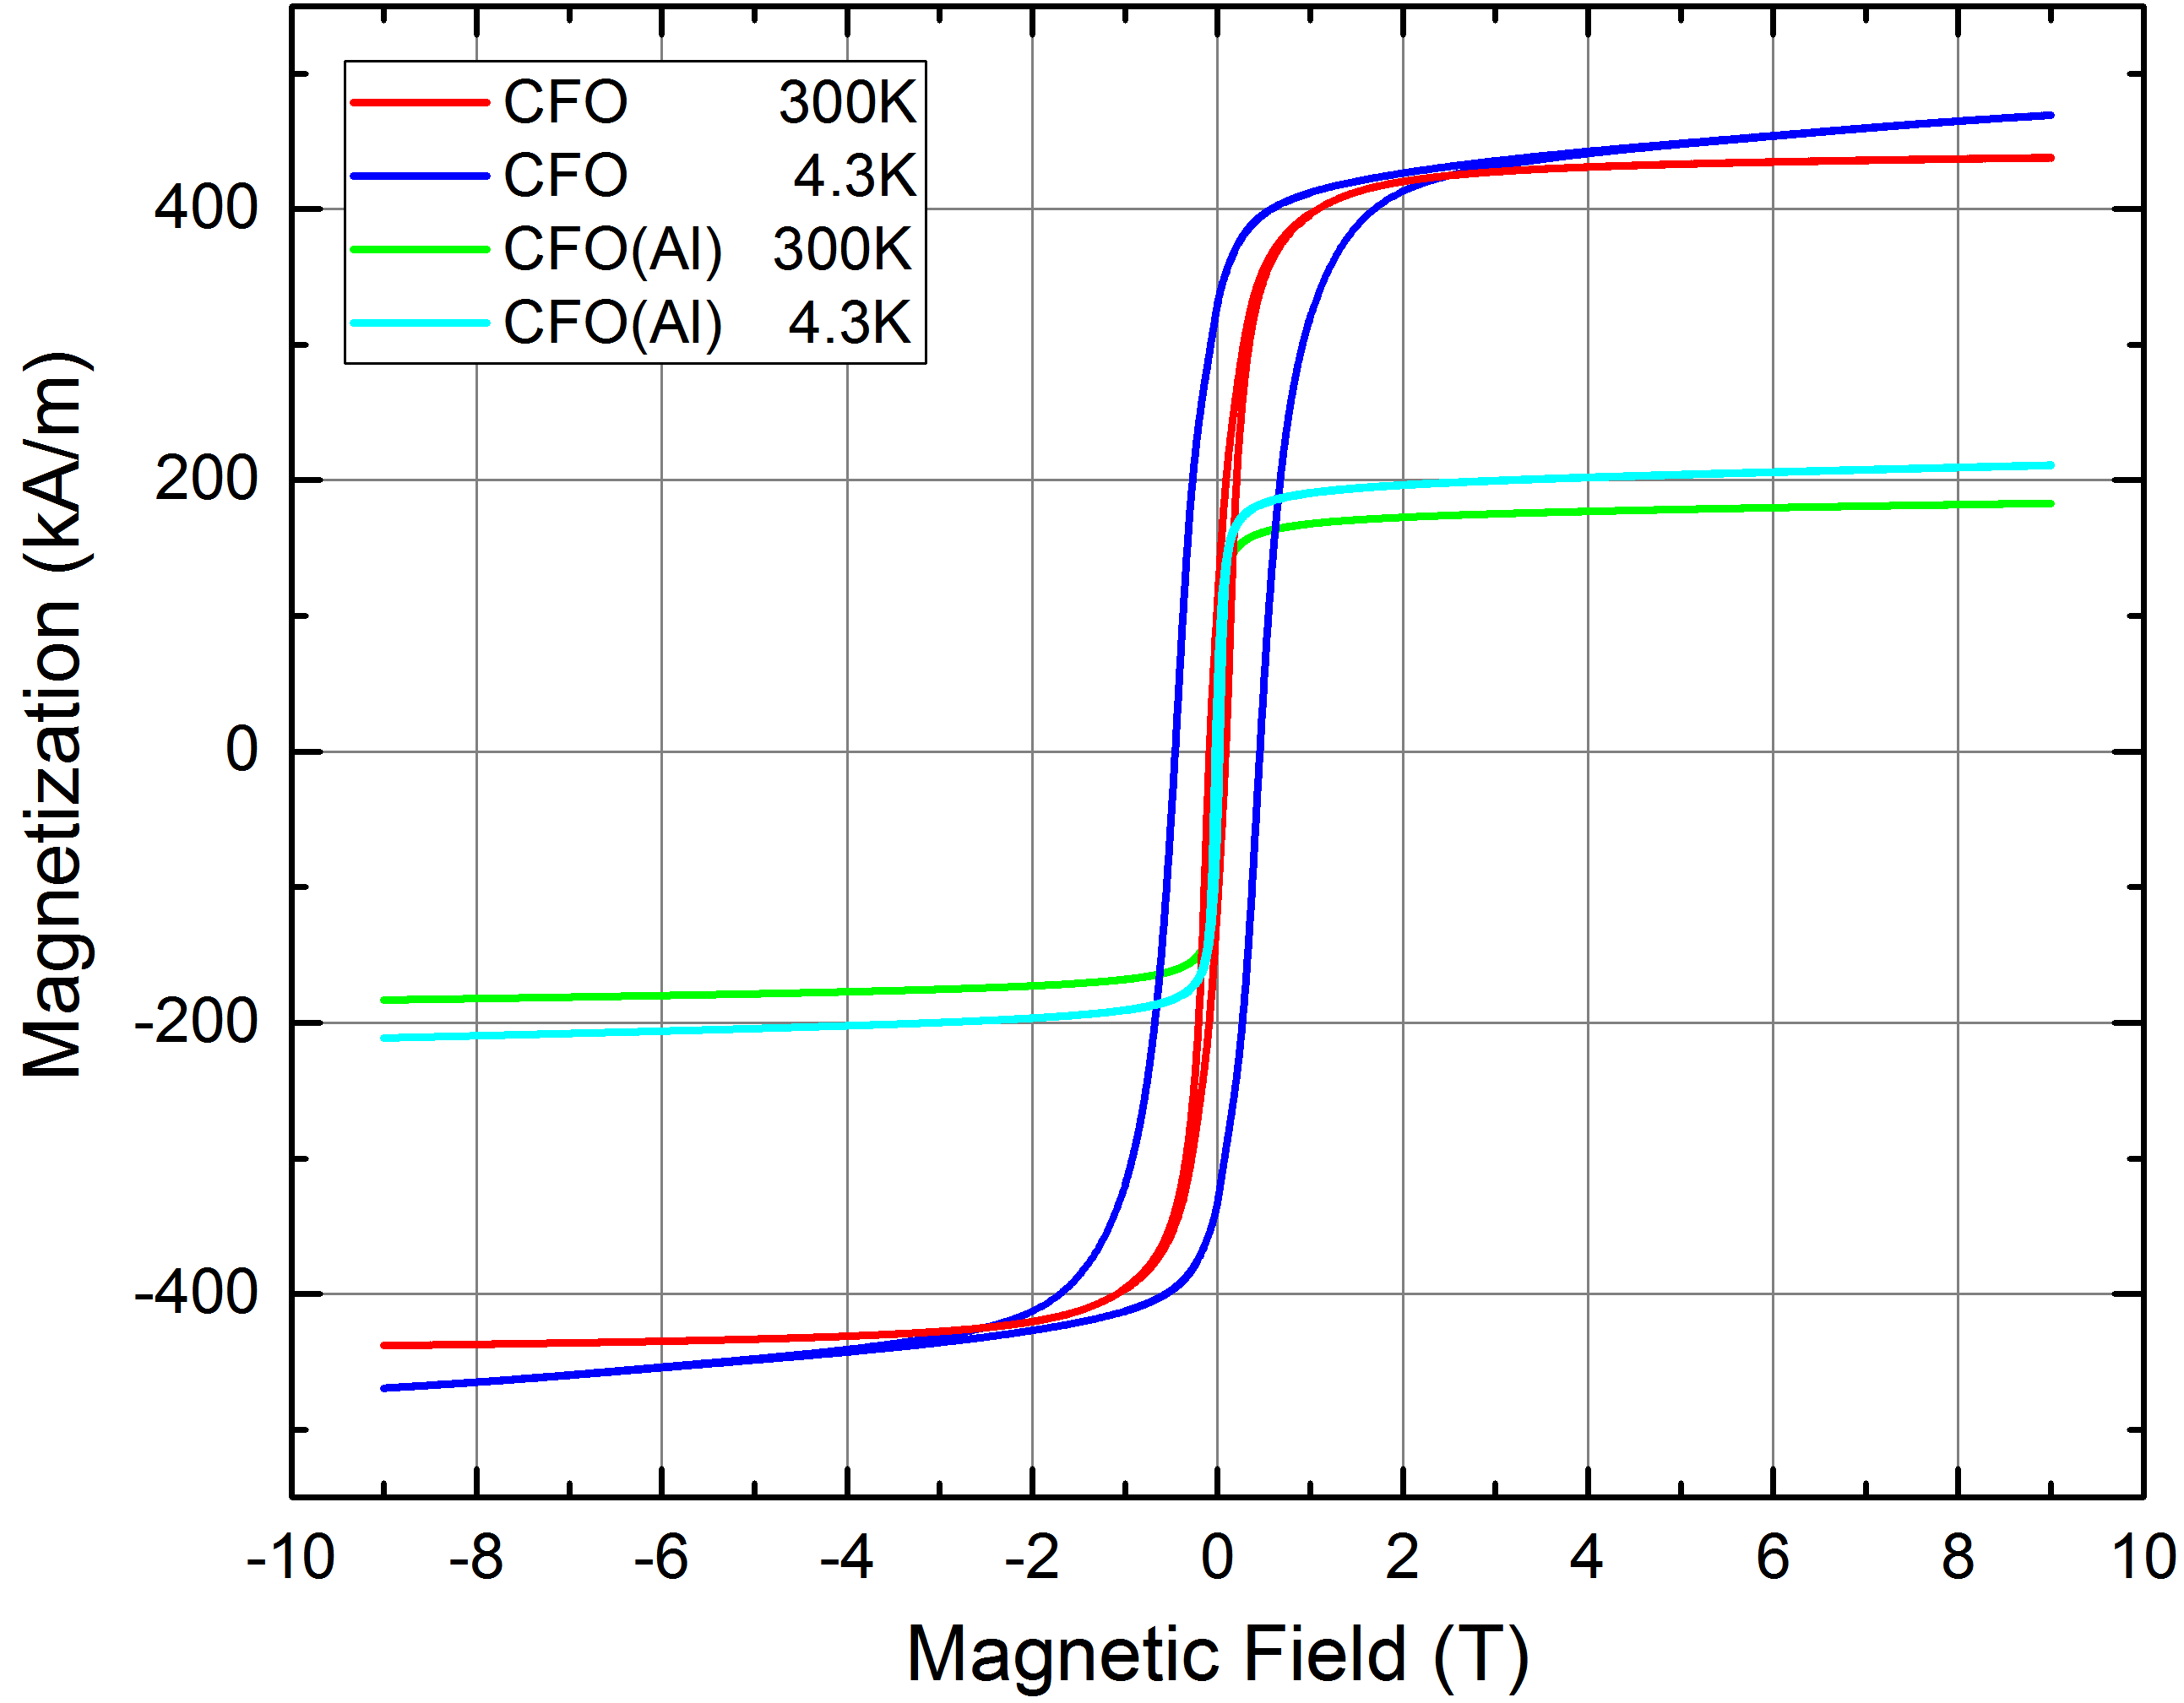


Fig. S3 M(H) curves for Al3+ doped and pure CFO at different temperatures as indicated in the legend.


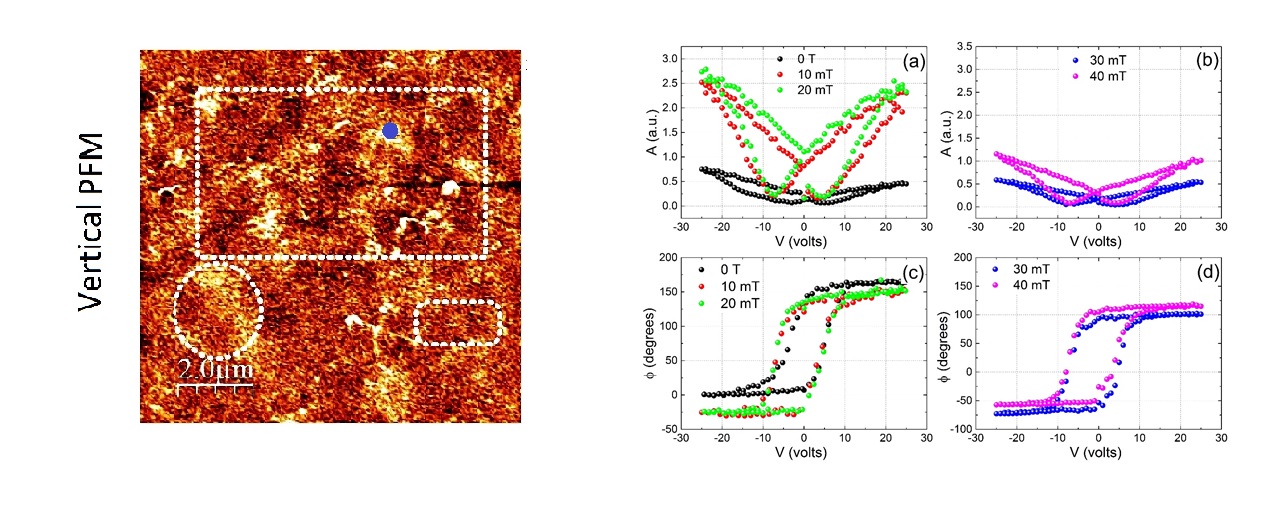


Fig.S 4 Variation of local amplitude (A) and phase (φ) under different in-plane dc magnetic fields for BCZT-CFO(Al) composite measured at the blue dot specified in the image. It is worth mentioning here that the variation of local loops represents the behavior of multi-domain piezoelectric grain surrounded by non-piezoelectric grains (in this case that of the CFO(Al)) in the presence of magnetic field. The reproducibility of such loops has not been verified but these might serve as good supplementary information for data presented in main text of the article.

References

1. Toby BH, Von Dreele RB. GSAS-II: the genesis of a modern open-source all purpose crystallography software package. *Journal of Applied Crystallography* **46**, 544-549 (2013).
